# Supplementary material for: The genetic prehistory of domesticated cattle from their origin to the spread across Europe
Source: PubMed Central journal article supplement (PMC4445560; doi:10.1186/s12863-015-0203-2), 2015-05-28

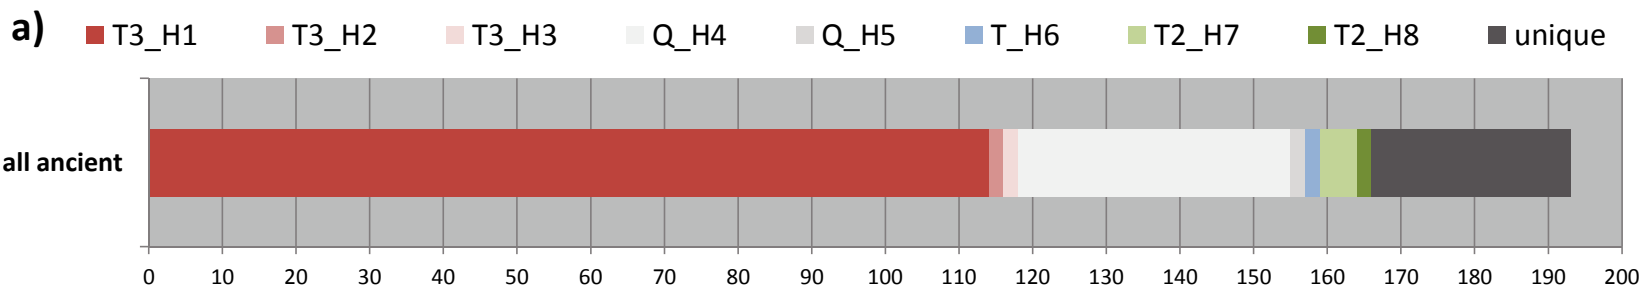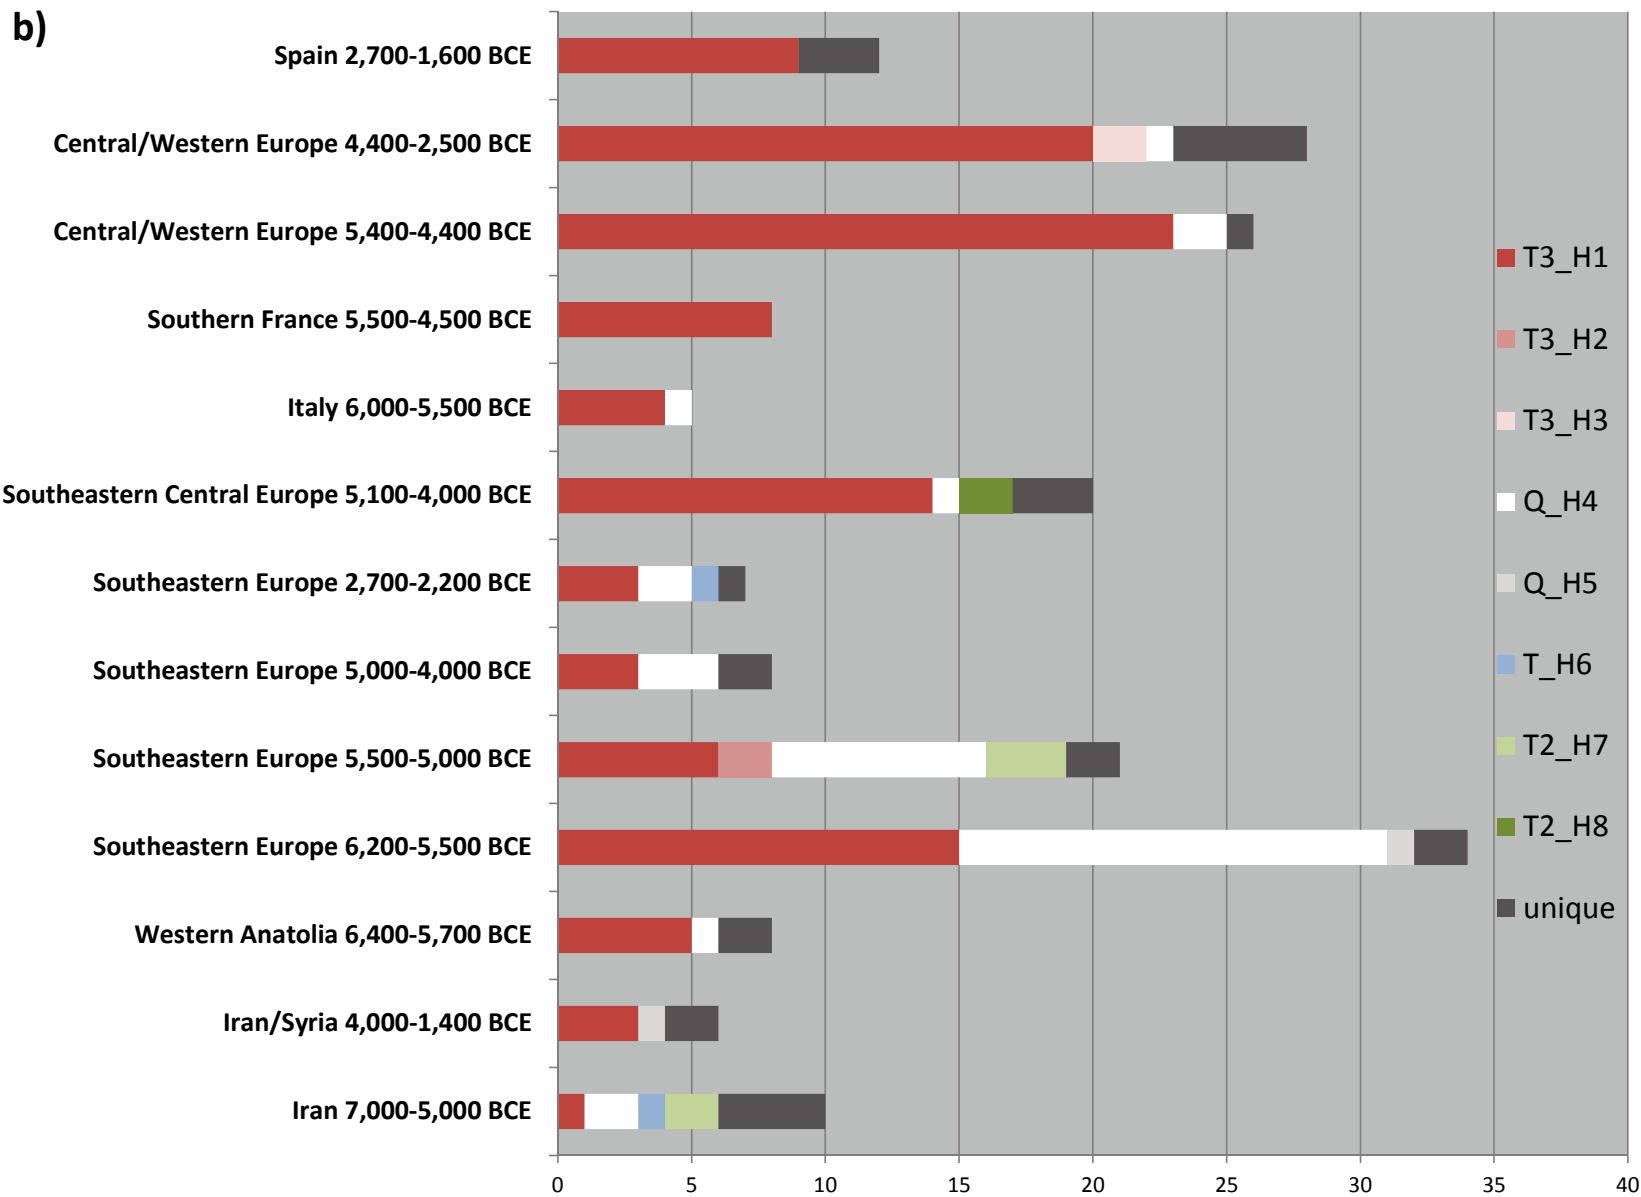

Supplement: 12863_2015_203_MOESM7_ESM.pdf [file 12863_2015_203_MOESM7_ESM.pdf]
